# Supplementary material
Source: PubMed Central journal article supplement (PMC9533319)
Supplement: NIHMS1820049-supplement-1820049_RS.pdf [file NIHMS1820049-supplement-1820049_RS.pdf]

## Reporting Summary

Nature Research wishes to improve the reproducibility of the work that we publish. This form provides structure for consistency and transparency in reporting. For further information on Nature Research policies, see [Authors & Referees](#) and the [Editorial Policy Checklist](#).

### Statistics

For all statistical analyses, confirm that the following items are present in the figure legend, table legend, main text, or Methods section.

n/a Confirmed

- The exact sample size ( $n$ ) for each experimental group/condition, given as a discrete number and unit of measurement
- A statement on whether measurements were taken from distinct samples or whether the same sample was measured repeatedly
- The statistical test(s) used AND whether they are one- or two-sided  
*Only common tests should be described solely by name; describe more complex techniques in the Methods section.*
- A description of all covariates tested
- A description of any assumptions or corrections, such as tests of normality and adjustment for multiple comparisons
- A full description of the statistical parameters including central tendency (e.g. means) or other basic estimates (e.g. regression coefficient) AND variation (e.g. standard deviation) or associated estimates of uncertainty (e.g. confidence intervals)
- For null hypothesis testing, the test statistic (e.g.  $F$ ,  $t$ ,  $r$ ) with confidence intervals, effect sizes, degrees of freedom and  $P$  value noted  
*Give  $P$  values as exact values whenever suitable.*
- For Bayesian analysis, information on the choice of priors and Markov chain Monte Carlo settings
- For hierarchical and complex designs, identification of the appropriate level for tests and full reporting of outcomes
- Estimates of effect sizes (e.g. Cohen's  $d$ , Pearson's  $r$ ), indicating how they were calculated

*Our web collection on [statistics for biologists](#) contains articles on many of the points above.*

### Software and code

Policy information about [availability of computer code](#)

Data collection

No commercial software has been used for data collection, all the software used is reported in the paper

Data analysis

All data analysis has been performed with open source software as comprehensively described in the methods of the paper

For manuscripts utilizing custom algorithms or software that are central to the research but not yet described in published literature, software must be made available to editors/reviewers. We strongly encourage code deposition in a community repository (e.g. GitHub). See the Nature Research [guidelines for submitting code & software](#) for further information.

### Data

Policy information about [availability of data](#)

All manuscripts must include a [data availability statement](#). This statement should provide the following information, where applicable:

- Accession codes, unique identifiers, or web links for publicly available datasets
- A list of figures that have associated raw data
- A description of any restrictions on data availability

Nucleotide sequences for the two new Italian cohorts are available in the Sequence Read Archive (SRA) under the accession number SRP136711. MetaPhlan2 and HUMAnN2 profiles for the new cohorts were also added to the curatedMetagenomicData R package along with their corresponding metadata. Validation Cohort1 is available in the European Nucleotide Archive (ENA) under the study identifier PRJEB27928, Validation Cohort2 is available in the DDBJ databases under the accession number DRA006684.

## Field-specific reporting

Please select the one below that is the best fit for your research. If you are not sure, read the appropriate sections before making your selection.

Life sciences       Behavioural & social sciences       Ecological, evolutionary & environmental sciences

For a reference copy of the document with all sections, see [nature.com/documents/nr-reporting-summary-flat.pdf](https://www.nature.com/documents/nr-reporting-summary-flat.pdf)

## Life sciences study design

All studies must disclose on these points even when the disclosure is negative.

|                 |                                                                                                                                                                                                                                                                          |
|-----------------|--------------------------------------------------------------------------------------------------------------------------------------------------------------------------------------------------------------------------------------------------------------------------|
| Sample size     | This is a meta-analysis of 9 shotgun metagenomic datasets for a total of 969 samples, details on the sample size of each dataset is reported in the paper                                                                                                                |
| Data exclusions | Samples not passing quality-control have been excluded. Details of the exclusion criteria are reported in the paper                                                                                                                                                      |
| Replication     | This is a meta-analysis so the main focus is indeed on the reproducibility. We thus used cross validation, cross-dataset prediction, leave-one-dataset-out validation, and independent validation on additional cohorts. qPCR measurements were also done in triplicates |
| Randomization   | All datasets are from a case/control design as described in the original publications and in our method section                                                                                                                                                          |
| Blinding        | Samples were collected from treatment- and diagnosis- naive subjects                                                                                                                                                                                                     |

## Reporting for specific materials, systems and methods

We require information from authors about some types of materials, experimental systems and methods used in many studies. Here, indicate whether each material, system or method listed is relevant to your study. If you are not sure if a list item applies to your research, read the appropriate section before selecting a response.

### Materials & experimental systems

### Methods

|                                     |                                                                 |
|-------------------------------------|-----------------------------------------------------------------|
| n/a                                 | Involvement in the study                                        |
| <input checked="" type="checkbox"/> | <input type="checkbox"/> Antibodies                             |
| <input checked="" type="checkbox"/> | <input type="checkbox"/> Eukaryotic cell lines                  |
| <input checked="" type="checkbox"/> | <input type="checkbox"/> Palaeontology                          |
| <input checked="" type="checkbox"/> | <input type="checkbox"/> Animals and other organisms            |
| <input type="checkbox"/>            | <input checked="" type="checkbox"/> Human research participants |
| <input checked="" type="checkbox"/> | <input type="checkbox"/> Clinical data                          |

|                                     |                                                 |
|-------------------------------------|-------------------------------------------------|
| n/a                                 | Involvement in the study                        |
| <input checked="" type="checkbox"/> | <input type="checkbox"/> ChIP-seq               |
| <input checked="" type="checkbox"/> | <input type="checkbox"/> Flow cytometry         |
| <input checked="" type="checkbox"/> | <input type="checkbox"/> MRI-based neuroimaging |

## Human research participants

Policy information about [studies involving human research participants](#)

|                            |                                                                                                                                                                                                                                                                                                                                                                                                                    |
|----------------------------|--------------------------------------------------------------------------------------------------------------------------------------------------------------------------------------------------------------------------------------------------------------------------------------------------------------------------------------------------------------------------------------------------------------------|
| Population characteristics | We report this information in Table 1 and Suppl. Table 1                                                                                                                                                                                                                                                                                                                                                           |
| Recruitment                | All subjects meeting the inclusion criteria were enrolled until the required sample size was reached                                                                                                                                                                                                                                                                                                               |
| Ethics oversight           | The two new clinical studies performed here were approved by the relevant ethics committees (Cohort1: Ethics committee of Azienda Ospedaliera "SS. Antonio e Biagio e C. Arrigo" of Alessandria, Italy, protocol N. Colorectal_miRNA_CEC2014 and Cohort2: Ethics committee of European Institute of Oncology of Milan, Italy, protocol N. R107/14-IEO 118) and informed consent was obtained from all participants |

Note that full information on the approval of the study protocol must also be provided in the manuscript.
